# Supplementary material for: TiO2-decorated graphenes as efficient photoswitches with high oxygen sensitivity
Source: Royal Society of Chemistry journal article supplement (doi:10.1039/c1sc00344e), 2011-01-01
Supplement: c1sc00344e.pdf [file c1sc00344e.pdf]

## Electronic Supplementary Information

### **TiO<sub>2</sub>-Decorated Graphenes as Efficient Photoswitches with High Oxygen Sensitivity†**

Qing Wang,<sup>a</sup> Xuefeng Guo,<sup>\*b,c</sup> Lichao Cai,<sup>b</sup> Yang Cao,<sup>b</sup> Lin Gan,<sup>b</sup> Song Liu,<sup>b</sup>

Zhenxing Wang,<sup>b</sup> Hongtao Zhang,<sup>b</sup> and Lidong Li<sup>\*a</sup>

<sup>a</sup>School of Materials Science and Engineering, University of Science and Technology

Beijing, Beijing, 100083, P. R. China. E-mail: lidong@mater.ustb.edu.cn

<sup>b</sup>Center for Nanochemistry, Beijing National Laboratory for Molecular Sciences,

State Key Laboratory for Structural Chemistry of Unstable and Stable Species,

College of Chemistry and Molecular Engineering, Peking University, Beijing 100871,

P. R. China. E-mail: guoxf@pku.edu.cn. Tel: (+86) 10-62757789

<sup>c</sup>Department of Advanced Materials and Nanotechnology, College of Engineering,

Peking University, Beijing 100871, P. R. China

This PDF file includes:  
Figs. S1 to S5

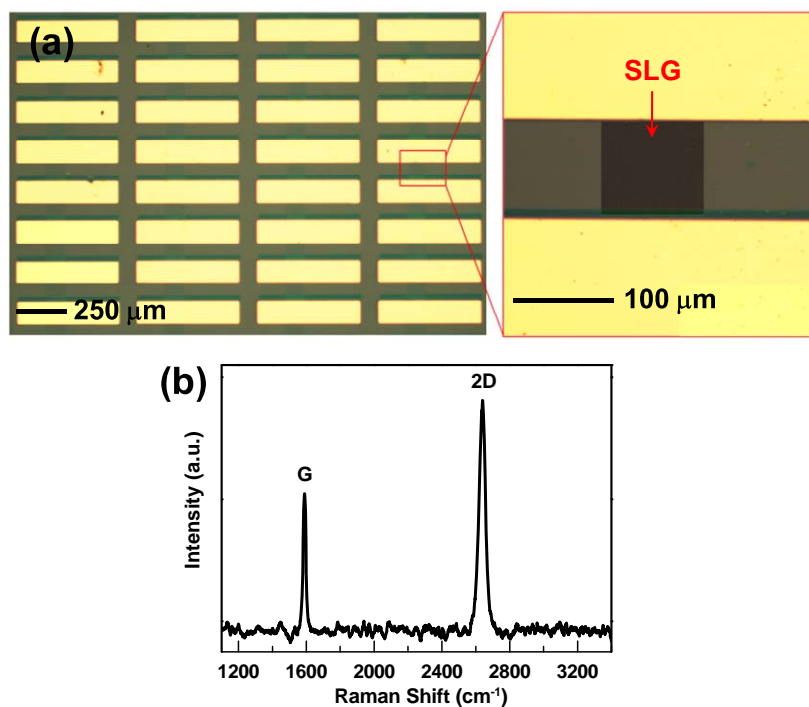

**Fig. S1** (a) Schematic representation of a SLG device array and an enlarged optical image of a representative device. (b) A representative Raman spectrum of a single-layer graphene with high quality.

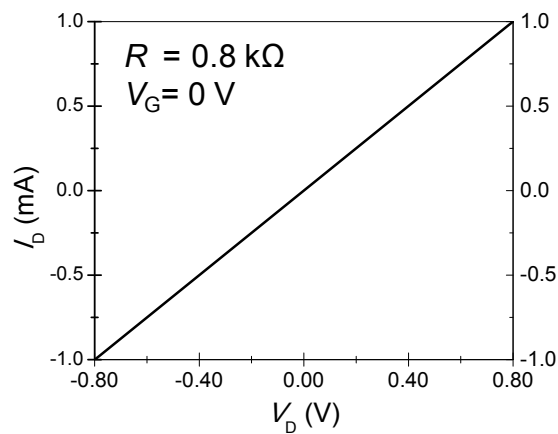

**Fig. S2** A representative electronic property of a SLG transistor. The device resistance is  $\sim 0.8 \text{ k}\Omega$ .

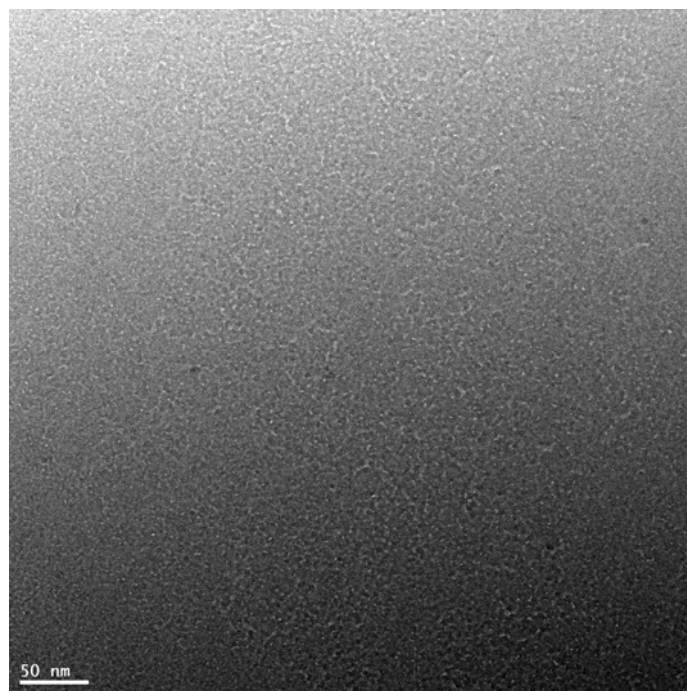

**Fig. S3** A low-resolution TEM image of a 5 nm-thick TiO<sub>2</sub> thin film formed through e-beam thermal evaporation.

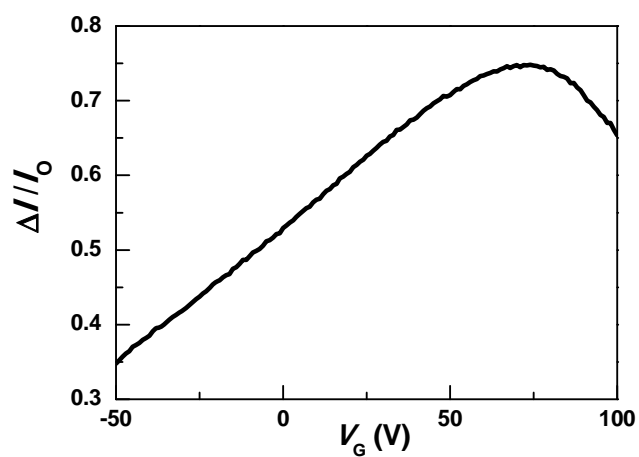

**Fig. S4** The gate-dependent spectrum of  $\Delta I/I_0$  for the device used in Figure 4a before and after exposure to oxygen under UV irradiation.  $V_D = 400 \mu\text{V}$ .

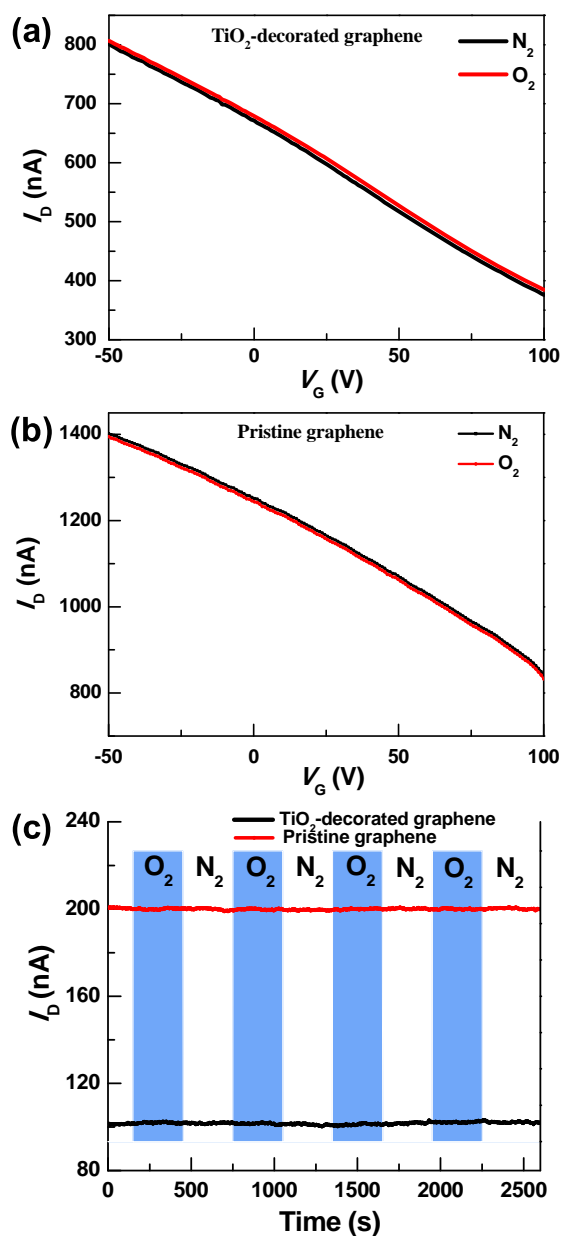

**Fig. S5** Device characteristics of a TiO<sub>2</sub>-decorated graphene device (a) and a pristine graphene device (b) before and after oxygen exposure without UV irradiation.  $V_D = 1$  mV. (c) Simultaneously recorded  $I_D$  for the same devices when sequentially exposed to oxygen and nitrogen (black for the TiO<sub>2</sub>-decorated graphene; red for the pristine graphene) without UV irradiation.  $V_D = 100$   $\mu$ V.  $V_G = 50$  V.
